# Supplementary material
Source: MDPI journal article supplement (https://www.mdpi.com/search?q=materials-12-00361)
Supplement: s001 [file materials-12-00361-s001.pdf]

Article

# Functional Chitosan Derivative and Chitin as Decolorization Materials for Methylene Blue and Methyl Orange from Aqueous Solution

Abdelkader Labidi <sup>1,2</sup>, Asier M. Salaberria <sup>3</sup>, Susana C. M. Fernandes <sup>4</sup>, Jalel Labidi <sup>3,\*</sup> and Manef Abderrabba <sup>1</sup>

<sup>1</sup> Preparatory Institute of Scientific and Technical Studies of Tunis, University of Carthage, Sidi Bou Said road, B.P. 51 2070, La Marsa, Tunisia; abdelkaderlabidi0907@gmail.com(A.L.); abderrabbanef@gmail.com(M.A.)

<sup>2</sup> Chemistry Department, University of Sciences of Tunis, El Manar University, B.P.: 248, El Manar II, 2092, Tunis, Tunisia.

<sup>3</sup> Department of Chemical and Environmental Engineering, University of the Basque Country (UPV/EHU), Plza. Europa1, 20018 Donostia-San Sebastian, Spain; asier.martinez@ehu.es

<sup>4</sup> CNRS/ Univ Pau & Pays Adour, Institut des Sciences Analytiques et de Physico-Chimie pour l'Environnement et les Materiaux, Umr 5254, 64000, Pau, France; susana.fernandes@univ-pau.fr

\* Correspondence: jalel.labidi@ehu.es

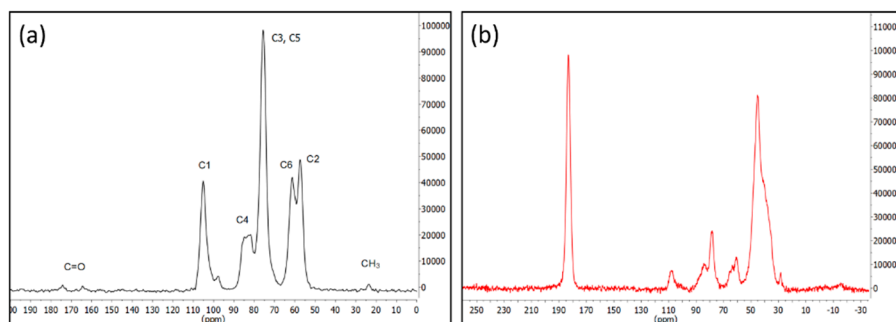

**Figure S1.** <sup>13</sup>C NMR spectra of chitosan (a) and chitosan-g-polyacrylamide (CS-g-PAM) (b).

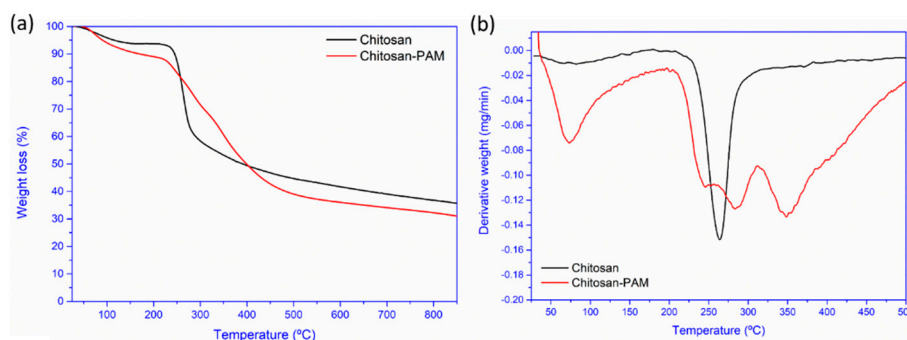

**Figure S2.** TGA (a) and DTG (b) spectra of chitosan and chitosan-g-polyacrylamide (CS-g-PAM).

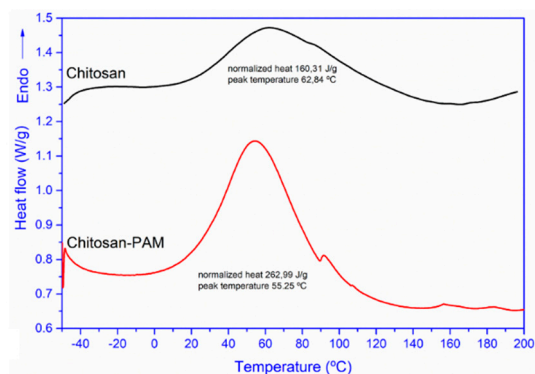

Figure S3. DSC spectra of chitosan and chitosan-g-polyacrylamide (CS-g-PAM).

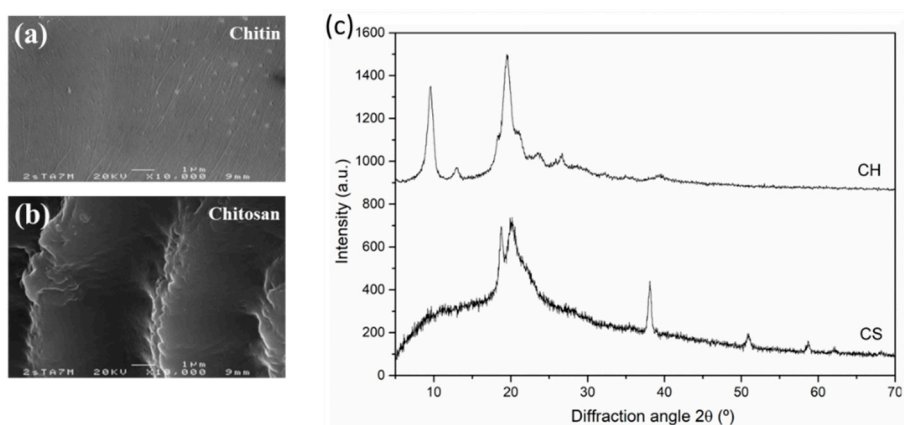

Figure S4. SEM micrographs of chitin (a) and chitosan (b); XRD of chitin and chitosan (c).

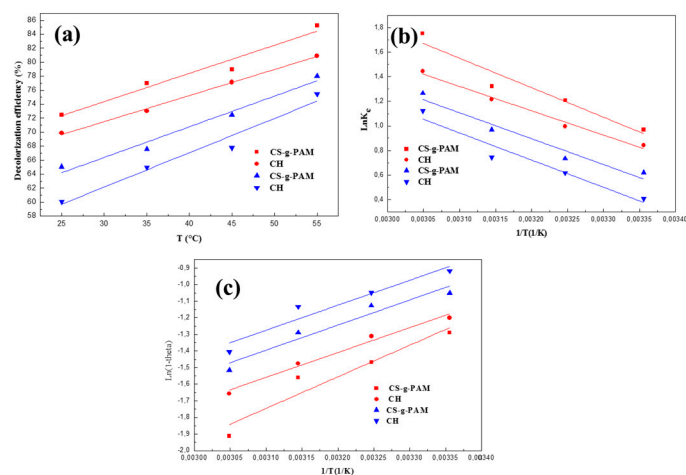

Figure S5. Arrhenius plot of  $LnK_c$  versus  $\frac{1}{T}$  for the decolorization of MB and MO by CS-g-PAM and CH: initial MB and MO concentration: 5.0 mg/mL; CS-g-PAM and CH concentration: 0.3 g·10mL<sup>-1</sup> (a); plot of  $ln(1 - \theta)$  versus  $\frac{1}{T}$  for the decolorization of dyes solution: initial MB, MO concentration: 10 mg/L; CS-g-PAM and CH concentration: 0.3 g·10mL<sup>-1</sup> at 25 °C (b).
